# Supplementary material for: What Proportion of Systematic Reviews and Meta-Analyses Published in the Annals of Surgery Provide Definitive Conclusions—A Systematic Review and Bibliometric Analysis
Source: MDPI journal article supplement (doi:10.3390/publications10020019), 2022-04-28
Supplement: s1 [file s1]

Archive with 1 entries (1 files):
- publications-1621419-supplementary.pdf
