# Supplementary material for: What Proportion of Systematic Reviews and Meta-Analyses Published in the Annals of Surgery Provide Definitive Conclusions—A Systematic Review and Bibliometric Analysis
Source: MDPI journal article supplement (doi:10.3390/publications10020019), 2022-04-28
Supplement: s1 [file s1 › publications-1621419-supplementary.pdf]

**What Proportion of Systematic Reviews and Meta-Analyses Published in  
the *Annals of Surgery* Provide Definitive Conclusions – A Systematic  
Review and Bibliometric Analysis**

**Supplementary Material**

**Table S1:** List of included systematic review and meta-analysis included in this systematic review by year of publication.

| 2020        | Country        | LOE | Surgery Type/Theme       | SR +/- MA | Number    | 2 Year Impact | Conclusive |
|-------------|----------------|-----|--------------------------|-----------|-----------|---------------|------------|
| Nickel      | Germany        | IA  | Gastrointestinal         | MA        | 224       | 35            | Yes        |
| Kuper       | Canada         | IA  | Gastrointestinal         | MA        | 792       | 8             | Yes        |
| Eyck        | Netherlands    | III | Gastrointestinal         | MA        | 1328      | N/C           | Yes        |
| Yeung       | United Kingdom | III | Gastrointestinal         | MA        | 10,718    | 28            | Yes        |
| Zhang       | Canada         | III | Opioid reduction         | MA        | 21,204    | 12            | Yes        |
| Petrelli    | Italy          | III | Gastrointestinal         | MA        | 3,579     | N/C           | No         |
| Wang        | China          | III | Gastrointestinal         | MA        | 4,025     | N/C           | Yes        |
| Blok        | Netherlands    | III | Gastrointestinal         | MA        | 1,894     | N/C           | Yes        |
| Page        | Canada         | III | Opioid reduction         | SR        | 1,398,182 | N/C           | Yes        |
| Attaar      | United States  | III | Cardiothoracic           | MA        | 37,118    | N/C           | Yes        |
| Chowdhury   | United Kingdom | IA  | Gastrointestinal         | MA        | 2,723     | N/C           | Yes        |
| McCarthy    | United States  | III | Gastrointestinal         | MA        | 653       | N/C           | No         |
| Zwanenburg  | Netherlands    | III | Wound complications      | MA        | 4,398     | N/C           | Yes        |
| Syn         | Singapore      | III | Gastrointestinal         | MA        | 3,148     | N/C           | Yes        |
| Braungart   | United Kingdom | III | Gastrointestinal         | SR        | 451       | N/C           | No         |
| Houghton    | United Kingdom | III | Vascular                 | MA        | 62,976    | N/C           | Yes        |
| Fu          | Netherlands    | IA  | Perioperative management | MA        | 4,968     | N/C           | Yes        |
| Rizan       | United Kingdom | III | Carbon footprint (other) | SR        | N/R       | N/C           | No         |
| <b>2019</b> |                |     |                          |           |           |               |            |
| Fernando    | Canada         | III | Soft tissue              | MA        | 5,982     | 28            | Yes        |
| Mungroop    | Netherlands    | IA  | Gastrointestinal         | MA        | 2,059     | 4             | Yes        |
| Visser      | Netherlands    | III | Gastrointestinal         | MA        | 48,612    | 15            | Yes        |
| Criss       | United States  | I   | Robotic (other)          | SR        | 16,562    | 3             | Yes        |
| Simons      | Netherlands    | III | Breast                   | MA        | 2,217     | 9             | No         |
| Poorthuis   | Netherlands    | III | Vascular                 | MA        | 6,901,162 | 7             | Yes        |
| Acuna       | Canada         | IA  | Gastrointestinal         | MA        | 2,347     | 16            | Yes        |
| Althoff     | Germany        | III | Hemovigilance (other)    | MA        | 235,779   | 30            | Yes        |

|               |                |     |                               |    |        |    |     |
|---------------|----------------|-----|-------------------------------|----|--------|----|-----|
| Syn           | Singapore      | III | Gastrointestinal              | MA | 1,621  | 5  | Yes |
| Simillis      | United Kingdom | IA  | Gastrointestinal              | MA | 6,237  | 17 | Yes |
| Rollins       | United Kingdom | III | Gastrointestinal              | MA | 69,517 | 22 | No  |
| Li            | Canada         | IA  | Anaesthesia/ Gastrointestinal | MA | 278    | 4  | Yes |
| Adiamah       | United Kingdom | IA  | Gastrointestinal              | MA | 1,387  | 17 | Yes |
| Gottlieb-Vedi | Sweden         | III | Gastrointestinal              | MA | 14,592 | 29 | Yes |
| Dorcarratto   | Spain          | III | Gastrointestinal              | MA | 12,817 | 13 | Yes |
| Podda         | Italy          | III | Gastrointestinal              | MA | 3,618  | 44 | No  |
| 2018          |                |     |                               |    |        |    |     |
| Viosini       | United States  | III | Gastrointestinal              | MA | 6,511  | 27 | Yes |
| Columbo       | United States  | III | Non-cardiac (other)           | MA | 48,874 | 13 | Yes |
| Penna         | United Kingdom | III | Gastrointestinal              | MA | 589    | 13 | Yes |
| Beger         | Germany        | III | Gastrointestinal              | MA | 1,295  | 17 | Yes |
| Schlottman    | United States  | III | Gastrointestinal              | MA | 5,834  | 27 | Yes |
| Wakaem        | Canada         | III | Breast                        | MA | 1,305  | 2  | No  |
| Fiore         | Canada         | II  | Gastrointestinal              | SR | N/R    | 6  | No  |
| Wang          | China          | III | Vascular                      | MA | 20,903 | 1  | Yes |
| Prete         | Italy          | IA  | Gastrointestinal              | MA | 671    | 22 | Yes |
| Margonis      | United States  | III | Gastrointestinal              | MA | 11,147 | 10 | Yes |
| Feinberg      | Canada         | II  | Opioid reduction              | SR | 3,535  | 25 | Yes |
| Borgersen     | Denmark        | II  | Simulation                    | SR | 18,312 | 9  | Yes |
| Childers      | United States  | III | Cost reduction (other)        | SR | 90,449 | 6  | No  |
| Simonsen      | Denmark        | III | Gastrointestinal              | MA | 7,176  | 20 | No  |
| Pan           | China          | III | Gastrointestinal              | MA | 1,757  | 13 | Yes |
| Liang         | China          | III | Cardiothoracic                | MA | 7,438  | 27 | Yes |
| Dattani       | United Kingdom | III | Gastrointestinal              | SR | 692    | 22 | Yes |
| 2017          |                |     |                               |    |        |    |     |
| French        | Australia      | IA  | Critical care                 | MA | 2,607  | 6  | No  |
| Sidhwa        | United States  | V   | Gastrointestinal              | MA | 2,929  | 8  | Yes |
| Grant         | United States  | IA  | Gastrointestinal              | MA | 4,142  | 15 | Yes |
| Liang         | United States  | III | Gastrointestinal              | SR | 4,199  | 20 | No  |

|              |                |     |                             |    |         |    |     |
|--------------|----------------|-----|-----------------------------|----|---------|----|-----|
| Simillis     | United Kingdom | III | Gastrointestinal            | MA | 19,607  | 8  | Yes |
| St John      | United Kingdom | III | Breast                      | MA | 8,052   | 18 | No  |
| Fesco        | Canada         | III | Gastrointestinal            | MA | 6,072   | 3  | No  |
| Pasquali     | Italy          | IA  | Surgical performance        | SR | 7,775   | 19 | Yes |
| Marshall     | New Zealand    | IA  | Gastrointestinal            | MA | 307     | 10 | Yes |
| Harnoss      | Germany        | III | Gastrointestinal            | MA | 2,551   | 22 | Yes |
| Lonjon       | France         | III | Propensity matching (other) | SR | N/R     | 8  | Yes |
| Gou          | China          | III | Cancer (other)              | MA | 16,366  | 7  | Yes |
| Payet        | France         | III | Long-term outcomes (other)  | SR | 55,830  | 0  | Yes |
| Pannucci     | United States  | III | Perioperative management    | MA | 14,776  | 14 | Yes |
| Ferris       | Canada         | III | Gastrointestinal            | MA | 29,812  | 21 | Yes |
| Fisher       | United States  | III | Gastrointestinal            | MA | 26,446  | 6  | Yes |
| Timberlake   | United States  | II  | Surgical education          | SR | N/R     | 1  | Yes |
| Allebas      | Netherlands    | III | Surgeon welfare             | MA | N/R     | 11 | No  |
| Alali        | Canada         | III | Neurosurgery                | MA | 12,366  | 9  | No  |
| <b>2016</b>  |                |     |                             |    |         |    |     |
| Chana        | United Kingdom | IV  | Emergency (other)           | SR | 744,238 | 6  | Yes |
| Maret-Ouda   | Sweden         | III | Gastrointestinal            | MA | 114,218 | 4  | Yes |
| Memon        | Australia      | IA  | Gastrointestinal            | MA | 406     | 10 | Yes |
| Petrelli     | Italy          | II  | Gastrointestinal            | MA | 3,584   | 37 | No  |
| Rollins      | United Kingdom | IA  | Gastrointestinal            | MA | 2,099   | 8  | Yes |
| Gordon-Weeks | United Kingdom | IV  | Gastrointestinal            | MA | 1,486   | 5  | Yes |
| Hata         | Japan          | III | Gastrointestinal            | MA | 58,023  | 17 | Yes |
| Louridas     | Canada         | III | Surgical skills/experience  | SR | N/R     | 1  | No  |
| Switzer      | Canada         | IV  | Academic surgery            | SR | N/R     | 4  | Yes |
| O'Connell    | Ireland        | II  | Orthopaedic/Neurosurgical   | MA | 1,677   | 5  | Yes |
| Yang         | China          | IA  | Postoperative management    | MA | 1,054   | 8  | Yes |
| Markar       | United Kingdom | III | Gastrointestinal            | SR | 991     | 27 | No  |
| Kwakman      | Netherlands    | III | Gastrointestinal            | MA | 3,036   | 5  | Yes |
| Willcutts    | United States  | III | Gastrointestinal            | MA | 2,112   | 5  | Yes |
| Barazanachi  | New Zealand    | IA  | Gastrointestinal            | MA | 1,031   | 4  | Yes |

|              |                |     |                             |    |           |    |     |
|--------------|----------------|-----|-----------------------------|----|-----------|----|-----|
| de Rooji     | Netherlands    | III | Gastrointestinal            | MA | 1,833     | 14 | Yes |
| Cousin       | France         | III | Gastrointestinal            | MA | 2,692     | 6  | Yes |
| Al-Maary     | Canada         | II  | Paediatric                  | MA | 211       | 9  | Yes |
| Cullis       | United Kingdom | III | Paediatric                  | SR | 414       | 1  | Yes |
| <b>2015</b>  |                |     |                             |    |           |    |     |
| Rowland      | United Kingdom | III | Gastrointestinal            | SR | 497       | 7  | Yes |
| Saleh        | United States  | III | Cardiovascular/Orthopaedics | MA | 8,952     | 2  | No  |
| Jones        | United Kingdom | IA  | Academic surgery            | SR | N/R       | 6  | No  |
| Muller-Stich | Germany        | III | Gastrointestinal            | MA | 818       | 21 | Yes |
| Panunzi      | Italy          | III | Gastrointestinal            | MA | 94,579    | 17 | Yes |
| Fokkema      | Netherlands    | III | Vascular                    | MA | 1,132     | 3  | Yes |
| Maruthappu   | France         | IV  | Surgical skills/experience  | SR | 1,061,913 | 9  | Yes |
| Matsuda      | Japan          | III | Gastrointestinal            | MA | 1,006     | 8  | Yes |
| Mazaki       | Japan          | III | Gastrointestinal            | MA | 7,572     | 4  | Yes |
| Adie         | Australia      | IA  | Academic surgery            | SR | N/R       | 1  | Yes |
| De Bruijn    | Netherlands    | III | Gastrointestinal            | SR | 1,731     | 4  | Yes |
| Menaham      | France         | IA  | Gastrointestinal            | MA | 562       | 21 | Yes |
| Szasz        | Canada         | III | Surgical skills/experience  | SR | 2,369     | 3  | No  |
| Roberts      | Canada         | IV  | Cardiothoracic              | SR | 466       | 7  | Yes |
| Kwon         | Korea          | III | Gastrointestinal            | MA | 3,361     | 1  | No  |
| Collaud      | Canada         | V   | Cardiothoracic              | SR | 135       | 3  | Yes |
| Vetter       | Switzerland    | V   | Perioperative management    | MA | 3,549     | 5  | No  |
| Siminas      | United Kingdom | IV  | Paediatric                  | SR | 1,157     | 5  | No  |
| <b>2014</b>  |                |     |                             |    |           |    |     |
| Gronkjaer    | Denmark        | III | Postoperative complications | MA | 533,602   | 4  | Yes |
| Kim          | Korea          | III | Gastrointestinal            | MA | 1,373     | 14 | Yes |
| Dawe         | Australia      | II  | Simulation                  | SR | N/R       | 11 | No  |
| Sharma       | New Zealand    | III | Gastrointestinal            | MA | 1,970     | 11 | Yes |
| Findlay      | United Kingdom | III | Gastrointestinal            | SR | 910       | 5  | Yes |
| Almenawer    | Canada         | III | Neurosurgery                | MA | 34,829    | 9  | Yes |
| Reames       | United States  | III | Epidemiology (other)        | SR | N/R       | 9  | Yes |

|             |                |     |                                 |    |           |    |     |
|-------------|----------------|-----|---------------------------------|----|-----------|----|-----|
| Howell      | United Kingdom | III | Postoperative complications     | SR | 7,802,423 | 7  | No  |
| Lee         | United States  | III | Gastrointestinal                | SR | N/R       | 7  | No  |
| UKNSRC      | United Kingdom | III | Gastrointestinal                | MA | 2,510     | 5  | Yes |
| Ahmed       | Canada         | III | Surgeon welfare                 | SR | N/R       | 20 | Yes |
| Popping     | Germany        | IA  | Perioperative management        | MA | 9,044     | 14 | Yes |
| Li          | China          | II  | Gastrointestinal                | MA | 1,315     | 3  | Yes |
| Harrysson   | United States  | IV  | Gastrointestinal                | SR | N/R       | 11 | No  |
| O'Callaghan | United Kingdom | IA  | Transplant                      | MA | 1,619     | 2  | Yes |
| Foster      | United Kingdom | IA  | Gastrointestinal                | MA | 5,857     | 2  | No  |
| Orri        | France         | V   | Surgeon welfare                 | MA | N/R       | 4  | Yes |
| Bouras      | United Kingdom | III | Gastrointestinal                | MA | 57,058    | 4  | Yes |
| Fayanju     | United States  | IV  | Breast                          | MA | 12,978    | 10 | Yes |
| 2013        |                |     |                                 |    |           |    |     |
| Yin         | China          | II  | Gastrointestinal                | MA | 956       | 8  | Yes |
| O'Brien     | Australia      | III | Gastrointestinal                | MA | 3,227     | 43 | Yes |
| Lin         | Japan          | IV  | Gastrointestinal                | SR | 2,278     | 18 | Yes |
| Pairkh      | United States  | III | Gastrointestinal                | MA | 9,991     | 29 | Yes |
| Honda       | Japan          | IA  | Gastrointestinal                | MA | 1,407     | 11 | Yes |
| Houssami    | Australia      | III | Breast                          | MA | 3,112     | 15 | Yes |
| Zendejas    | Canada         | III | Surgical skills/simulation      | SR | 7,138     | 10 | Yes |
| Halaou      | Netherlands    | III | Breast                          | SR | 1,343     | 8  | Yes |
| Roberts     | Canada         | III | Neurosurgery                    | MA | 5,704     | 3  | Yes |
| Broeders    | Australia      | IA  | Gastrointestinal                | MA | 458       | 13 | Yes |
| Knops       | Netherlands    | III | Patient decision making (other) | MA | 2,674     | 9  | Yes |
| Chang       | New Zealand    | IA  | Postoperative complications     | MA | 6,979     | 4  | Yes |
| Berqvist    | Sweden         | V   | Vascular                        | SR | 231       | 8  | No  |
| Russ        | United Kingdom | II  | Perioperative care              | SR | N/R       | 7  | No  |
| Adie        | Australia      | IA  | Academic surgery                | SR | N/R       | 4  | Yes |
| Acedillo    | Canada         | III | Postoperative complications     | MA | 679,173   | 2  | No  |
| Leinicke    | United States  | III | Cardiothoracic                  | MA | 538       | 7  | Yes |

|                |                |     |                             |    |           |    |     |
|----------------|----------------|-----|-----------------------------|----|-----------|----|-----|
| Eliassen       | Denmark        | III | Postoperative complications | MA | 1,234,019 | 4  | Yes |
| Teraa          | Netherlands    | IA  | Vascular                    | MA | 510       | 8  | No  |
| Schoenberg     | Germany        | II  | Gastrointestinal            | MA | 590       | 8  | Yes |
| 2012           |                |     |                             |    |           |    |     |
| Verschurr-Maes | Netherlands    | III | Breast                      | SR | 1,672     | 2  | No  |
| Maniko         | United States  | IV  | Gastrointestinal            | SR | N/R       | 14 | Yes |
| Lehman         | Switzerland    | III | Gastrointestinal            | SR | N/R       | 14 | Yes |
| Vinuela        | United States  | I   | Gastrointestinal            | MA | 3,055     | 15 | Yes |
| Guo            | United States  | IA  | Palliative (other)          | MA | 1,332     | 2  | Yes |
| Blencowe       | United Kingdom | III | Gastrointestinal            | SR | 57,299    | 9  | No  |
| Maniko         | United States  | III | Gastrointestinal            | SR | 378       | 12 | Yes |
| Talat          | United Kingdom | V   | Soft tissue                 | SR | 278       | 10 | Yes |
| Hansson        | Netherlands    | III | Gastrointestinal            | SR | 733       | 13 | Yes |
| Chang          | New Zealand    | IA  | Postoperative complications | MA | 836       | 3  | No  |
| van Baal       | Netherlands    | III | Gastrointestinal            | MA | 7,161     | 6  | Yes |
| O'Reilly       | Ireland        | IA  | Gastrointestinal            | SR | 998       | 12 | Yes |
| Gheorghe       | United Kingdom | III | Postoperative complications | SR | 1,933     | 8  | No  |
| Venkat         | United States  | III | Gastrointestinal            | MA | 1,814     | 22 | Yes |
| Marimutha      | United Kingdom | IA  | Gastrointestinal            | MA | 2,496     | 9  | Yes |
| Sorenson       | Denmark        | IV  | Postoperative complications | SR | N/R       | 11 | Yes |
| Zevin          | Canada         | IV  | Gastrointestinal            | SR | 458,032   | 5  | No  |
| Zeng           | China          | III | Gastrointestinal            | MA | 3,411     | 16 | No  |
| Edwards        | Canada         | IA  | Postoperative complications | MA | 1,008     | 11 | Yes |
| Acheson        | United Kingdom | III | Gastrointestinal            | MA | 20,795    | 14 | Yes |
| Warshckow      | Switzerland    | III | Gastrointestinal            | MA | 1,832     | 9  | Yes |
| Borchard       | Austria        | III | Perioperative care          | SR | N/R       | 9  | Yes |
| Shabanzadeh    | Denmark        | III | Gastrointestinal            | MA | 58,755    | 7  | Yes |
| Rahbour        | United Kingdom | IA  | Gastrointestinal            | MA | 288       | 3  | Yes |
| Kao            | United States  | IA  | Perioperative care          | MA | 4,778     | 3  | No  |
| 2011           |                |     |                             |    |           |    |     |
| Ahmad          | Ireland        | IA  | Perioperative care          | MA | 3,122     | 2  | Yes |

|            |                |     |                    |    |        |    |     |
|------------|----------------|-----|--------------------|----|--------|----|-----|
| Thakur     | Canada         | IA  | Gastrointestinal   | MA | 1,460  | 4  | No  |
| Jay        | United States  | III | Transplant         | MA | 4,944  | 9  | Yes |
| Groenveld  | Netherlands    | III | Perioperative care | SR | 42,806 | 12 | Yes |
| Pontiroli  | Italy          | IA  | Gastrointestinal   | MA | 44,022 | 17 | Yes |
| Patel      | Canada         | III | Gastrointestinal   | SR | 440    | 6  | No  |
| Mirnaezami | United Kingdom | III | Gastrointestinal   | MA | 21,902 | 12 | Yes |
| Memon      | Australia      | IA  | Gastrointestinal   | MA | 1,876  | 6  | Yes |
| Broeders   | Netherlands    | IA  | Gastrointestinal   | MA | 690    | 3  | Yes |
| Mertz      | Canada         | IA  | Cardiothoracic     | MA | 7,893  | 2  | No  |
| Srinivasa  | New Zealand    | IA  | Gastrointestinal   | MA | 439    | 3  | Yes |
| Dhir       | United States  | III | Gastrointestinal   | MA | 4,821  | 7  | Yes |
| Houmossi   | Australia      | III | Breast             | MA | 6,166  | 5  | Yes |
| Mollberg   | Germany        | III | Gastrointestinal   | MA | 2,609  | 14 | Yes |
| Boshier    | United Kingdom | III | Gastrointestinal   | MA | 5,905  | 11 | No  |

LOE; level of evidence, SR; systematic review, MA; meta-analysis, N/C; not calculable, N/R; not reported/recorded.

**Table S2:** Correlations between study characteristics and the conclusiveness of systematic review and meta-analyses published in the *Annals of Surgery* which were included in the current study.

| Parameter               | Number (%) | Number that are Conclusive (%) | P-value         |
|-------------------------|------------|--------------------------------|-----------------|
| Country                 |            |                                |                 |
| - United States         | 30 (16.1%) | 23 (76.7%)                     | 0.971, $\chi^2$ |
| - United Kingdom        | 35 (18.8%) | 22 (62.9%)                     |                 |
| - Switzerland           | 3 (1.6%)   | 2 (66.7%)                      |                 |
| - Sweden                | 3 (1.6%)   | 2 (66.7%)                      |                 |
| - Spain                 | 1 (0.5%)   | 1 (100.0%)                     |                 |
| - Singapore             | 2 (1.1%)   | 2 (100.0%)                     |                 |
| - New Zealand           | 6 (3.2%)   | 5 (83.3%)                      |                 |
| - Netherlands           | 21 (11.3%) | 17 (81.0%)                     |                 |
| - Korea                 | 2 (1.1%)   | 1 (50.0%)                      |                 |
| - Japan                 | 5 (2.7%)   | 5 (100.0%)                     |                 |
| - Italy                 | 7 (3.8%)   | 4 (57.1%)                      |                 |
| - Ireland               | 3 (1.6%)   | 3 (100.0%)                     |                 |
| - Germany               | 8 (4.3%)   | 8 (100.0%)                     |                 |
| - France                | 6 (3.2%)   | 6 (100.0%)                     |                 |
| - Denmark               | 6 (3.2%)   | 5 (83.3%)                      |                 |
| - China                 | 9 (4.8%)   | 8 (88.9%)                      |                 |
| - Canada                | 28 (15.1%) | 17 (60.7%)                     |                 |
| - Austria               | 1 (0.5%)   | 1 (100.0%)                     |                 |
| - Australia             | 10 (5.4%)  | 8 (80.0%)                      |                 |
| Region                  |            |                                |                 |
| - North America         | 58 (31.2%) | 40 (69.0%)                     | 0.416, $\chi^2$ |
| - Europe                | 94 (50.5%) | 71 (75.5%)                     |                 |
| - Australia/New Zealand | 16 (8.6%)  | 13 (81.3%)                     |                 |
| - Asia                  | 18 (9.7%)  | 16 (88.9%)                     |                 |
| Level of Evidence       |            |                                |                 |

|                            |               |                 |                 |
|----------------------------|---------------|-----------------|-----------------|
| - Level 1                  | 45 (21.2%)    | 37 (82.2%)      | 0.342, $\chi^2$ |
| - Level 2                  | 12 (6.5%)     | 8 (66.7%)       |                 |
| - Level 3                  | 111 (59.7%)   | 82(73.9%)       |                 |
| - Level 4                  | 12 (6.5%)     | 9 (75.0%)       |                 |
| - Level 5                  | 6 (3.2%)      | 4 (66.7%)       |                 |
| Level of Evidence          |               |                 |                 |
| - High Level of Evidence   | 57 (30.7%)    | 45 (78.9%)      | 0.465, †        |
| - Low Level of Evidence    | 129 (69.3%)   | 94 (72.9%)      |                 |
| Type of Surgery / Topic    |               |                 |                 |
| - Academic                 | 4             | 3 (75.0%)       | 0.736, $\chi^2$ |
| - Breast                   | 8             | 4 (50.0%)       |                 |
| - Other                    | 14            | 11 (78.6%)      |                 |
| - Cardiothoracic           | 7             | 5 (71.4%)       |                 |
| - GI/General               | 103           | 82 (79.6%)      |                 |
| - Neurosurgery             | 3             | 2 (66.7%)       |                 |
| - Opioid Crisis            | 3             | 3 (100.0%)      |                 |
| - Paediatric               | 3             | 2 (66.7%)       |                 |
| - Perioperative management | 9             | 6 (66.7%)       |                 |
| - Postoperative management | 11            | 7 (63.6%)       |                 |
| - Simulation               | 3             | 2 (66.7%)       |                 |
| - Soft Tissue              | 2             | 2 (100.0%)      |                 |
| - Surgical welfare         | 3             | 2 (66.7%)       |                 |
| - Surgical Education       | 5             | 3 (60.0%)       |                 |
| - Transplant               | 2             | 2 (100.0%)      |                 |
| - Vascular                 | 6             | 4 (66.7%)       |                 |
| Study Type                 |               |                 |                 |
| - Systematic Review        | 55 (29.6%)    | 34 (61.8%)      | 0.009, †        |
| - Meta-Analysis            | 131 (70.4%)   | 106 (80.9%)     |                 |
| Two-year Impact Factor     |               |                 |                 |
| - Conclusive               | Mean (+/- SD) | 9.40 (+/- 9.35) | 0.251, ‡        |
| - Inconclusive             | Mean (+/- SD) | 11.10 +/- 7.93  |                 |

GI; gastrointestinal, mgt; management, SD; standard deviation.

$\chi^2$  denotes Chi-Square test.

† denotes Fisher's Exact test.

‡ denotes Independent samples T-test.

**Table S3:** Correlations between study characteristics based on subgroups and the conclusiveness of systematic review and meta-analyses published in the *Annals of Surgery* which were included in the current study.

| Parameter                    | Number of Inconclusive Studies (%) | Number of Conclusive studies (%) | P-value         |
|------------------------------|------------------------------------|----------------------------------|-----------------|
| Region - LOE                 |                                    |                                  |                 |
| North America                |                                    |                                  |                 |
| - Level 1                    | 3                                  | 8                                | 0.873, $\chi^2$ |
| - Level 2                    | 1                                  | 3                                |                 |
| - Level 3                    | 12                                 | 23                               |                 |
| - Level 4                    | 2                                  | 4                                |                 |
| - Level 5                    | 0                                  | 2                                |                 |
| Europe                       |                                    |                                  |                 |
| - Level 1                    | 3                                  | 18                               | 0.505, $\chi^2$ |
| - Level 2                    | 2                                  | 3                                |                 |
| - Level 3                    | 15                                 | 44                               |                 |
| - Level 4                    | 1                                  | 4                                |                 |
| - Level 5                    | 2                                  | 2                                |                 |
| Australia/New Zealand        |                                    |                                  |                 |
| - Level 1                    | 2                                  | 9                                | 0.072, $\chi^2$ |
| - Level 2                    | 1                                  | 0                                |                 |
| - Level 3                    | 0                                  | 4                                |                 |
| Asia                         |                                    |                                  |                 |
| - Level 1                    | 0                                  | 2                                | 0.834, $\chi^2$ |
| - Level 2                    | 0                                  | 2                                |                 |
| - Level 3                    | 2                                  | 11                               |                 |
| - Level 4                    | 0                                  | 1                                |                 |
| Region – Surgical Speciality |                                    |                                  |                 |
| North America                |                                    |                                  |                 |
| - Academic                   | 0                                  | 1                                | 0.923, $\chi^2$ |

|                            |    |    |                 |
|----------------------------|----|----|-----------------|
| - Breast                   | 1  | 1  |                 |
| - Other                    | 1  | 4  |                 |
| - Cardiothoracic           | 2  | 4  |                 |
| - GI/General               | 9  | 17 |                 |
| - Neurosurgery             | 1  | 2  |                 |
| - Opioid Crisis            | 0  | 3  |                 |
| - Paediatric               | 0  | 1  |                 |
| - Perioperative management | 1  | 1  |                 |
| - Postoperative management | 1  | 1  |                 |
| - Simulation               | 0  | 1  |                 |
| - Soft Tissue              | 0  | 1  |                 |
| - Surgical welfare         | 0  | 1  |                 |
| - Surgical Education       | 2  | 1  |                 |
| - Transplant               | 0  | 1  |                 |
| Europe                     |    |    |                 |
| - Academic                 | 1  | 0  | 0.289, $\chi^2$ |
| - Breast                   | 3  | 1  |                 |
| - Other                    | 1  | 6  |                 |
| - GI/General               | 10 | 45 |                 |
| - Paediatric               | 1  | 1  |                 |
| - Perioperative management | 2  | 5  |                 |
| - Postoperative management | 2  | 4  |                 |
| - Simulation               | 0  | 1  |                 |
| - Soft Tissue              | 0  | 1  |                 |
| - Surgical welfare         | 1  | 1  |                 |
| - Surgical Education       | 0  | 2  |                 |
| - Transplant               | 0  | 1  |                 |
| - Vascular                 | 2  | 3  |                 |
| Australia/New Zealand      |    |    |                 |
| - Academic                 | 0  | 2  |                 |
| - Breast                   | 0  | 2  |                 |

|                            |    |    |                 |
|----------------------------|----|----|-----------------|
| - Other                    | 1  | 0  |                 |
| - GI/General               | 0  | 8  |                 |
| - Postoperative management | 1  | 1  |                 |
| - Simulation               | 1  | 0  |                 |
| Asia                       |    |    |                 |
| - Other                    | 0  | 1  | 0.958, $\chi^2$ |
| - Cardiothoracic           | 0  | 1  |                 |
| - GI/General               | 2  | 12 |                 |
| - Postoperative management | 0  | 1  |                 |
| - Vascular                 | 0  | 1  |                 |
| Region –Study Type         |    |    |                 |
| North America              |    |    |                 |
| - Systematic review        | 9  | 12 | 0.237, †        |
| - Meta-Analysis            | 9  | 28 |                 |
| Europe                     |    |    |                 |
| - Systematic review        | 11 | 19 | 0.074, †        |
| - Meta-Analysis            | 12 | 52 |                 |
| Australia/New Zealand      |    |    |                 |
| - Systematic review        | 1  | 2  | 0.489, †        |
| - Meta-Analysis            | 2  | 11 |                 |
| Asia                       |    |    |                 |
| - Systematic review        | 0  | 1  | 1.000, †        |
| - Meta-Analysis            | 2  | 15 |                 |
| LOE – Surgical Speciality  |    |    |                 |
| Level I                    |    |    |                 |
| - Academic                 | 1  | 2  | 0.114, $\chi^2$ |
| - Other                    | 1  | 2  |                 |
| - Cardiothoracic           | 1  | 0  |                 |
| - GI/General               | 2  | 25 |                 |
| - Perioperative management | 1  | 3  |                 |
| - Postoperative management | 1  | 3  |                 |

|                            |    |    |                 |
|----------------------------|----|----|-----------------|
| - Surgical Education       | 0  | 1  |                 |
| - Transplant               | 0  | 1  |                 |
| - Vascular                 | 1  | 0  |                 |
| Level II                   |    |    |                 |
| - Other                    | 0  | 1  | 0.629, $\chi^2$ |
| - GI/General               | 2  | 3  |                 |
| - Opioid Crisis            | 0  | 1  |                 |
| - Paediatric               | 0  | 1  |                 |
| - Perioperative management | 1  | 0  |                 |
| - Simulation               | 1  | 1  |                 |
| - Surgical Education       | 0  | 1  |                 |
| Level III                  |    |    |                 |
| - Breast                   | 4  | 3  | 0.280, $\chi^2$ |
| - Other                    | 2  | 7  |                 |
| - Cardiothoracic           | 1  | 3  |                 |
| - GI/General               | 15 | 50 |                 |
| - Neurosurgery             | 1  | 2  |                 |
| - Opioid Crisis            | 0  | 2  |                 |
| - Paediatric               | 0  | 1  |                 |
| - Perioperative management | 0  | 3  |                 |
| - Postoperative management | 3  | 3  |                 |
| - Simulation               | 0  | 1  |                 |
| - Soft Tissue              | 0  | 1  |                 |
| - Surgical welfare         | 1  | 1  |                 |
| - Surgical Education       | 2  | 0  |                 |
| - Transplant               | 0  | 1  |                 |
| - Vascular                 | 0  | 4  |                 |
| Level IV                   |    |    |                 |
| - Academic                 | 0  | 1  | 0.587, $\chi^2$ |
| - Breast                   | 0  | 1  |                 |
| - Other                    | 0  | 1  |                 |

|                                  |    |    |                 |
|----------------------------------|----|----|-----------------|
| - Cardiothoracic                 | 0  | 1  |                 |
| - GI/General                     | 2  | 3  |                 |
| - Paediatric                     | 0  | 1  |                 |
| - Postoperative management       | 0  | 1  |                 |
| - Surgical Education             | 0  | 1  |                 |
| Level V                          |    |    |                 |
| - Cardiothoracic                 | 0  | 1  | 0.306, $\chi^2$ |
| - GI/General                     | 0  | 1  |                 |
| - Perioperative management       | 1  | 0  |                 |
| - Soft Tissue                    | 0  | 1  |                 |
| - Surgical welfare               | 0  | 1  |                 |
| - Vascular                       | 1  | 0  |                 |
| LOE –Study Type                  |    |    |                 |
| Level I                          |    |    |                 |
| - Systematic review              | 1  | 5  | 1.000, †        |
| - Meta-Analysis                  | 7  | 32 |                 |
| Level II                         |    |    |                 |
| - Systematic review              | 3  | 3  | 0.545, †        |
| - Meta-Analysis                  | 1  | 5  |                 |
| Level III                        |    |    |                 |
| - Systematic review              | 13 | 17 | 0.016, †        |
| - Meta-Analysis                  | 16 | 65 |                 |
| Level IV                         |    |    |                 |
| - Systematic review              | 3  | 7  | 1.000, †        |
| - Meta-Analysis                  | 0  | 2  |                 |
| Level V                          |    |    |                 |
| - Systematic review              | 1  | 2  | 1.000, †        |
| - Meta-Analysis                  | 1  | 2  |                 |
| Study Type - Surgical Speciality |    |    |                 |
| Systematic Review                |    |    |                 |
| - Academic                       | 1  | 3  | 0.850, $\chi^2$ |

|                            |    |    |                 |
|----------------------------|----|----|-----------------|
| - Breast                   | 1  | 1  |                 |
| - Other                    | 2  | 5  |                 |
| - Cardiothoracic           | 0  | 2  |                 |
| - GI/General               | 9  | 10 |                 |
| - Opioid Crisis            | 0  | 2  |                 |
| - Paediatric               | 1  | 1  |                 |
| - Perioperative management | 1  | 2  |                 |
| - Postoperative management | 2  | 1  |                 |
| - Simulation               | 1  | 2  |                 |
| - Soft Tissue              | 0  | 1  |                 |
| - Surgical welfare         | 0  | 1  |                 |
| - Surgical Education       | 2  | 3  |                 |
| - Vascular                 | 1  | 0  |                 |
| Meta-Analysis              |    |    |                 |
| - Breast                   | 3  | 3  | 0.592, $\chi^2$ |
| - Other                    | 1  | 6  |                 |
| - Cardiothoracic           | 2  | 3  |                 |
| - GI/General               | 12 | 72 |                 |
| - Neurosurgery             | 1  | 2  |                 |
| - Opioid Crisis            | 0  | 1  |                 |
| - Paediatric               | 0  | 1  |                 |
| - Perioperative management | 2  | 4  |                 |
| - Postoperative management | 2  | 6  |                 |
| - Soft Tissue              | 0  | 1  |                 |
| - Surgical welfare         | 1  | 1  |                 |
| - Transplant               | 0  | 2  |                 |
| - Vascular                 | 1  | 4  |                 |

LOE; level of evidence, GI; gastrointestinal

## Full Reference List

1. Attaar, A., V. Tam, and K.S. Nason, *Risk Factors for Prolonged Air Leak After Pulmonary Resection: A Systematic Review and Meta-analysis*. Annals of Surgery, 2020. **271**(5).
2. Blok, R.D., et al., *A Systematic Review and Meta-analysis on Omentoplasty for the Management of Abdominoperineal Defects in Patients Treated for Cancer*. Annals of Surgery, 2020. **271**(4).
3. Braungart, S. and S. Siminas, *Early Enteral Nutrition Following Gastrointestinal Surgery in Children: A Systematic Review of the Literature*. Annals of Surgery, 2020. **272**(2).
4. Chowdhury, A.H., et al., *Perioperative Probiotics or Synbiotics in Adults Undergoing Elective Abdominal Surgery: A Systematic Review and Meta-analysis of Randomized Controlled Trials*. Annals of Surgery, 2020. **271**(6).
5. Eyck, B.M., et al., *Accuracy of Detecting Residual Disease After Neoadjuvant Chemoradiotherapy for Esophageal Cancer: A Systematic Review and Meta-analysis*. Annals of Surgery, 2020. **271**(2).
6. Fu, V.X., et al., *The Effect of Perioperative Music on Medication Requirement and Hospital Length of Stay: A Meta-analysis*. Annals of Surgery, 2020. **272**(6).
7. Houghton, J.S.M., et al., *Frailty Factors and Outcomes in Vascular Surgery Patients: A Systematic Review and Meta-analysis*. Annals of Surgery, 2020. **272**(2).
8. Kuper, T.M., et al., *Prophylactic Negative Pressure Wound Therapy for Closed Laparotomy Incisions: A Meta-analysis of Randomized Controlled Trials*. Annals of Surgery, 2020. **271**(1).
9. McCarty, T.R., P. Jirapinyo, and C.C. Thompson, *Effect of Sleeve Gastrectomy on Ghrelin, GLP-1, PYY, and GIP Gut Hormones: A Systematic Review and Meta-analysis*. Annals of Surgery, 2020. **272**(1).
10. Nickel, F., et al., *Laparoscopic Versus Open Pancreaticoduodenectomy: A Systematic Review and Meta-analysis of Randomized Controlled Trials*. Annals of Surgery, 2020. **271**(1).
11. Pagé, M.G., et al., *A Systematic Review of the Relative Frequency and Risk Factors for Prolonged Opioid Prescription Following Surgery and Trauma Among Adults*. Annals of Surgery, 2020. **271**(5).
12. Petrelli, F., et al., *Total Neoadjuvant Therapy in Rectal Cancer: A Systematic Review and Meta-analysis of Treatment Outcomes*. Annals of Surgery, 2020. **271**(3).
13. Rizan, C., et al., *The Carbon Footprint of Surgical Operations: A Systematic Review*. Annals of Surgery, 2020. **272**(6).

14. Syn, N.L., et al., *Survival Advantage of Laparoscopic Versus Open Resection For Colorectal Liver Metastases: A Meta-analysis of Individual Patient Data From Randomized Trials and Propensity-score Matched Studies*. Annals of Surgery, 2020. **272**(2).
15. Wang, X., et al., *Early Versus Delayed Surgical Repair and Referral for Patients With Bile Duct Injury: A Systematic Review and Meta-analysis*. Annals of Surgery, 2020. **271**(3).
16. Yeung, K.T.D., et al., *Does Sleeve Gastrectomy Expose the Distal Esophagus to Severe Reflux?: A Systematic Review and Meta-analysis*. Annals of Surgery, 2020. **271**(2).
17. Zhang, D.D.Q., et al., *A Systematic Review of Behavioral Interventions to Decrease Opioid Prescribing After Surgery*. Annals of Surgery, 2020. **271**(2).
18. Zwanenburg, P.R., et al., *Meta-analysis, Meta-regression, and GRADE Assessment of Randomized and Nonrandomized Studies of Incisional Negative Pressure Wound Therapy Versus Control Dressings for the Prevention of Postoperative Wound Complications*. Annals of Surgery, 2020. **272**(1).
19. Acuna, S.A., et al., *Laparoscopic Versus Open Resection for Rectal Cancer: A Noninferiority Meta-analysis of Quality of Surgical Resection Outcomes*. Annals of Surgery, 2019. **269**(5).
20. Adimah, A., et al., *The Impact of Preoperative Immune Modulating Nutrition on Outcomes in Patients Undergoing Surgery for Gastrointestinal Cancer: A Systematic Review and Meta-analysis*. Annals of Surgery, 2019. **270**(2).
21. Althoff, F.C., et al., *Multimodal Patient Blood Management Program Based on a Three-pillar Strategy: A Systematic Review and Meta-analysis*. Annals of Surgery, 2019. **269**(5).
22. Criss, C.N., et al., *The Impact of Corporate Payments on Robotic Surgery Research: A Systematic Review*. Annals of Surgery, 2019. **269**(3).
23. Dorcaratto, D., et al., *Impact of Postoperative Complications on Survival and Recurrence After Resection of Colorectal Liver Metastases: Systematic Review and Meta-analysis*. Annals of Surgery, 2019. **270**(6).
24. Fernando, S.M., et al., *Necrotizing Soft Tissue Infection: Diagnostic Accuracy of Physical Examination, Imaging, and LRINEC Score: A Systematic Review and Meta-Analysis*. Annals of Surgery, 2019. **269**(1).
25. Gottlieb-Vedi, E., et al., *Long-term Survival in Esophageal Cancer After Minimally Invasive Compared to Open Esophagectomy: A Systematic Review and Meta-analysis*. Annals of Surgery, 2019. **270**(6).
26. Li, J., et al., *Efficacy and Safety of Patient-controlled Analgesia Compared With Epidural Analgesia After Open Hepatic Resection: A Systematic Review and Meta-analysis*. Annals of Surgery, 2019. **270**(2).
27. Mungroop, T.H., et al., *Preperitoneal or Subcutaneous Wound Catheters as Alternative for Epidural Analgesia in Abdominal Surgery: A Systematic Review and Meta-analysis*. Annals of Surgery, 2019. **269**(2).
28. Podda, M., et al., *Antibiotic Treatment and Appendectomy for Uncomplicated Acute Appendicitis in Adults and Children: A Systematic Review and Meta-analysis*. Annals of Surgery, 2019. **270**(6).

29. Poorthuis, M.H.F., et al., *High Operator and Hospital Volume Are Associated With a Decreased Risk of Death and Stroke After Carotid Revascularization: A Systematic Review and Meta-analysis*. Annals of Surgery, 2019. **269**(4).
30. Rollins, K.E., et al., *The Role of Oral Antibiotic Preparation in Elective Colorectal Surgery: A Meta-analysis*. Annals of Surgery, 2019. **270**(1).
31. Simillis, C., et al., *Open Versus Laparoscopic Versus Robotic Versus Transanal Mesorectal Excision for Rectal Cancer: A Systematic Review and Network Meta-analysis*. Annals of Surgery, 2019. **270**(1).
32. Simons, J.M., et al., *Diagnostic Accuracy of Different Surgical Procedures for Axillary Staging After Neoadjuvant Systemic Therapy in Node-positive Breast Cancer: A Systematic Review and Meta-analysis*. Annals of Surgery, 2019. **269**(3).
33. Syn, N.L., et al., *Pouch Versus No Pouch Following Total Gastrectomy: Meta-analysis of Randomized and Non-randomized Studies*. Annals of Surgery, 2019. **269**(6).
34. Visser, E., et al., *Prognostic Value of Lymph Node Yield on Overall Survival in Esophageal Cancer Patients: A Systematic Review and Meta-analysis*. Annals of Surgery, 2019. **269**(2).
35. Beger, H.G., et al., *New Onset of Diabetes and Pancreatic Exocrine Insufficiency After Pancreaticoduodenectomy for Benign and Malignant Tumors: A Systematic Review and Meta-analysis of Long-term Results*. Annals of Surgery, 2018. **267**(2).
36. Borgersen, N.J., et al., *Gathering Validity Evidence for Surgical Simulation: A Systematic Review*. Annals of Surgery, 2018. **267**(6).
37. Childers, C.P., et al., *Interventions to Reduce Intraoperative Costs: A Systematic Review*. Annals of Surgery, 2018. **268**(1).
38. Columbo, J.A., et al., *A Meta-analysis of the Impact of Aspirin, Clopidogrel, and Dual Antiplatelet Therapy on Bleeding Complications in Noncardiac Surgery*. Annals of Surgery, 2018. **267**(1).
39. Dattani, M., et al., *Oncological and Survival Outcomes in Watch and Wait Patients With a Clinical Complete Response After Neoadjuvant Chemoradiotherapy for Rectal Cancer: A Systematic Review and Pooled Analysis*. Annals of Surgery, 2018. **268**(6).
40. Feinberg, A.E., et al., *Opioid Use After Discharge in Postoperative Patients: A Systematic Review*. Annals of Surgery, 2018. **267**(6).
41. Fiore, J.F., Jr., et al., *How Do We Value Postoperative Recovery?: A Systematic Review of the Measurement Properties of Patient-reported Outcomes After Abdominal Surgery*. Annals of Surgery, 2018. **267**(4).
42. Liang, H., et al., *Robotic Versus Video-assisted Lobectomy/Segmentectomy for Lung Cancer: A Meta-analysis*. Annals of Surgery, 2018. **268**(2).
43. Margonis, G.A., et al., *Impact of Surgical Margin Width on Recurrence and Overall Survival Following R0 Hepatic Resection of Colorectal Metastases: A Systematic Review and Meta-analysis*. Annals of Surgery, 2018. **267**(6).
44. Pan, L., et al., *The Safety and Efficacy of Laparoscopic Common Bile Duct Exploration Combined with Cholecystectomy for the Management of Cholecysto-choledocholithiasis: An Up-to-date Meta-analysis*. Annals of Surgery, 2018. **268**(2).
45. Penna, M., et al., *Laparoscopic Lavage Versus Primary Resection for Acute Perforated Diverticulitis: Review and Meta-analysis*. Annals of Surgery, 2018. **267**(2).

46. Prete, F.P., et al., *Robotic Versus Laparoscopic Minimally Invasive Surgery for Rectal Cancer: A Systematic Review and Meta-analysis of Randomized Controlled Trials*. Annals of Surgery, 2018. **267**(6).
47. Schlottmann, F., et al., *Laparoscopic Heller Myotomy Versus Peroral Endoscopic Myotomy (POEM) for Achalasia: A Systematic Review and Meta-analysis*. Annals of Surgery, 2018. **267**(3).
48. Simonsen, C., et al., *Sarcopenia and Postoperative Complication Risk in Gastrointestinal Surgical Oncology: A Meta-analysis*. Annals of Surgery, 2018. **268**(1).
49. Visioni, A., et al., *Enhanced Recovery After Surgery for Noncolorectal Surgery?: A Systematic Review and Meta-analysis of Major Abdominal Surgery*. Annals of Surgery, 2018. **267**(1).
50. Wakeam, E., S.A. Acuna, and S. Keshavjee, *Chest Wall Resection for Recurrent Breast Cancer in the Modern Era: A Systematic Review and Meta-analysis*. Annals of Surgery, 2018. **267**(4).
51. Wang, J., et al., *Percutaneous Vascular Interventions Versus Bypass Surgeries in Patients With Critical Limb Ischemia: A Comprehensive Meta-analysis*. Annals of Surgery, 2018. **267**(5).
52. Alali, A.S., et al., *Beta-blockers and Traumatic Brain Injury: A Systematic Review, Meta-analysis, and Eastern Association for the Surgery of Trauma Guideline*. Annals of Surgery, 2017. **266**(6).
53. Alleblas, C.C.J., et al., *Prevalence of Musculoskeletal Disorders Among Surgeons Performing Minimally Invasive Surgery: A Systematic Review*. Annals of Surgery, 2017. **266**(6).
54. Fecso, A.B., et al., *The Effect of Technical Performance on Patient Outcomes in Surgery: A Systematic Review*. Annals of Surgery, 2017. **265**(3).
55. Ferris, M., et al., *The Global Incidence of Appendicitis: A Systematic Review of Population-based Studies*. Annals of Surgery, 2017. **266**(2).
56. Fisher, A.V., et al., *30-day Readmission After Pancreatic Resection: A Systematic Review of the Literature and Meta-analysis*. Annals of Surgery, 2017. **266**(2).
57. French, C.J., et al., *Erythropoiesis-stimulating Agents in Critically Ill Trauma Patients: A Systematic Review and Meta-analysis*. Annals of Surgery, 2017. **265**(1).
58. Grant, M.C., et al., *Impact of Enhanced Recovery After Surgery and Fast Track Surgery Pathways on Healthcare-associated Infections: Results From a Systematic Review and Meta-analysis*. Annals of Surgery, 2017. **265**(1).
59. Guo, Q., et al., *Perioperative Pharmacological Thromboprophylaxis in Patients With Cancer: A Systematic Review and Meta-analysis*. Annals of Surgery, 2017. **265**(6).
60. Harnoss, J.C., et al., *Antibiotics Versus Surgical Therapy for Uncomplicated Appendicitis: Systematic Review and Meta-analysis of Controlled Trials (PROSPERO 2015: CRD42015016882)*. Annals of Surgery, 2017. **265**(5).

61. Lonjon, G., et al., *Potential Pitfalls of Reporting and Bias in Observational Studies With Propensity Score Analysis Assessing a Surgical Procedure: A Methodological Systematic Review*. Annals of Surgery, 2017. **265**(5).
62. Marshall, J.R., et al., *Laparoscopic Lavage in the Management of Hinchey Grade III Diverticulitis: A Systematic Review*. Annals of Surgery, 2017. **265**(4).
63. Pannucci, C.J., et al., *Individualized Venous Thromboembolism Risk Stratification Using the 2005 Caprini Score to Identify the Benefits and Harms of Chemoprophylaxis in Surgical Patients: A Meta-analysis*. Annals of Surgery, 2017. **265**(6).
64. Pasquali, S., et al., *Survival After Neoadjuvant and Adjuvant Treatments Compared to Surgery Alone for Resectable Esophageal Carcinoma: A Network Meta-analysis*. Annals of Surgery, 2017. **265**(3).
65. Payet, C., et al., *Methodological Quality of Surgical Mortality Studies Using Large Hospital Databases: A Systematic Review*. Annals of Surgery, 2017. **265**(6).
66. Sidhwa, F., et al., *Diagnosis and Treatment of the Extraesophageal Manifestations of Gastroesophageal Reflux Disease*. Annals of Surgery, 2017. **265**(1).
67. Simillis, C., et al., *A Systematic Review to Assess Resection Margin Status After Abdominoperineal Excision and Pelvic Exenteration for Rectal Cancer*. Annals of Surgery, 2017. **265**(2).
68. St John, E.R., et al., *Diagnostic Accuracy of Intraoperative Techniques for Margin Assessment in Breast Cancer Surgery: A Meta-analysis*. Annals of Surgery, 2017. **265**(2).
69. Timberlake, M.D., et al., *What Do We Know About Intraoperative Teaching?: A Systematic Review*. Annals of Surgery, 2017. **266**(2).
70. Liang, M.K., et al., *Ventral Hernia Management: Expert Consensus Guided by Systematic Review*. Ann Surg, 2017. **265**(1): p. 80-89.
71. Al-Maary, J., et al., *Fetal Tracheal Occlusion for Severe Pulmonary Hypoplasia in Isolated Congenital Diaphragmatic Hernia: A Systematic Review and Meta-analysis of Survival*. Annals of Surgery, 2016. **264**(6).
72. Barazanchi, A.W.H., et al., *Routine Neurectomy of Inguinal Nerves During Open Onlay Mesh Hernia Repair: A Meta-analysis of Randomized Trials*. Annals of Surgery, 2016. **264**(1).
73. Chana, P., et al., *A Systematic Review of the Impact of Dedicated Emergency Surgical Services on Patient Outcomes*. Annals of Surgery, 2016. **263**(1).
74. Cousin, F., et al., *Diagnostic Accuracy of Procalcitonin and C-reactive Protein for the Early Diagnosis of Intra-abdominal Infection After Elective Colorectal Surgery: A Meta-analysis*. Annals of Surgery, 2016. **264**(2).
75. Cullis, P.S., S. Siminas, and P.D. Losty, *Is Screening of Intestinal Foregut Anatomy in Heterotaxy Patients Really Necessary?: A Systematic Review in Search of the Evidence*. Annals of Surgery, 2016. **264**(6).
76. de Rooij, T., et al., *Minimally Invasive Versus Open Pancreatoduodenectomy: Systematic Review and Meta-analysis of Comparative Cohort and Registry Studies*. Annals of Surgery, 2016. **264**(2).

77. Gordon-Weeks, A.N., et al., *Systematic Review and Meta-analysis of Current Experience in Treating IPNB: Clinical and Pathological Correlates*. Annals of Surgery, 2016. **263**(4).
78. Hata, T., et al., *Effect of Hospital Volume on Surgical Outcomes After Pancreaticoduodenectomy: A Systematic Review and Meta-analysis*. Annals of Surgery, 2016. **263**(4).
79. Kwakman, R., et al., *Clinicopathological Parameters in Patient Selection for Cytoreductive Surgery and Hyperthermic Intraperitoneal Chemotherapy for Colorectal Cancer Metastases: A Meta-analysis*. Annals of Surgery, 2016. **263**(6).
80. Louridas, M., et al., *Can We Predict Technical Aptitude?: A Systematic Review*. Annals of Surgery, 2016. **263**(4).
81. Maret-Ouda, J., et al., *Antireflux Surgery and Risk of Esophageal Adenocarcinoma: A Systematic Review and Meta-analysis*. Annals of Surgery, 2016. **263**(2).
82. Markar, S.R., et al., *Influence of Surgical Resection of Hepatic Metastases From Gastric Adenocarcinoma on Long-term Survival: Systematic Review and Pooled Analysis*. Annals of Surgery, 2016. **263**(6).
83. Memon, M.A., et al., *Suture Cruroplasty Versus Prosthetic Hiatal Herniorrhaphy for Large Hiatal Hernia: A Meta-analysis and Systematic Review of Randomized Controlled Trials*. Annals of Surgery, 2016. **263**(2).
84. O'Connell, S., et al., *The Use of Intermittent Pneumatic Compression in Orthopedic and Neurosurgical Postoperative Patients: A Systematic Review and Meta-analysis*. Annals of Surgery, 2016. **263**(5).
85. Petrelli, F., et al., *Increasing the Interval Between Neoadjuvant Chemoradiotherapy and Surgery in Rectal Cancer: A Meta-analysis of Published Studies*. Annals of Surgery, 2016. **263**(3).
86. Rollins, K.E. and D.N. Lobo, *Intraoperative Goal-directed Fluid Therapy in Elective Major Abdominal Surgery: A Meta-analysis of Randomized Controlled Trials*. Annals of Surgery, 2016. **263**(3).
87. Switzer, N.J., et al., *Quality of Follow-up: Systematic Review of the Research in Bariatric Surgery*. Annals of Surgery, 2016. **263**(5).
88. Willcutts, K.F., et al., *Early Oral Feeding as Compared With Traditional Timing of Oral Feeding After Upper Gastrointestinal Surgery: A Systematic Review and Meta-analysis*. Annals of Surgery, 2016. **264**(1).
89. Yang, D., et al., *A Meta-analysis of Intraoperative Ventilation Strategies to Prevent Pulmonary Complications: Is Low Tidal Volume Alone Sufficient to Protect Healthy Lungs?* Annals of Surgery, 2016. **263**(5).
90. Adie, S., et al., *Quality of Conduct and Reporting of Meta-analyses of Surgical Interventions*. Annals of Surgery, 2015. **261**(4).
91. Collaud, S., et al., *En Bloc Resection of Pulmonary Sulcus Non-small Cell Lung Cancer Invading the Spine: A Systematic Literature Review and Pooled Data Analysis*. Annals of Surgery, 2015. **262**(1).
92. De Bruijn, K.M.J. and C.H.J. van Eijck, *New-onset Diabetes After Distal Pancreatectomy: A Systematic Review*. Annals of Surgery, 2015. **261**(5).

93. Fokkema, M., et al., *Stenting Versus Endarterectomy for Restenosis Following Prior Ipsilateral Carotid Endarterectomy: An Individual Patient Data Meta-analysis*. Annals of Surgery, 2015. **261**(3).
94. Jones, E.L., et al., *Quality of Reporting on Patient and Public Involvement Within Surgical Research: A Systematic Review*. Annals of Surgery, 2015. **261**(2).
95. Kwon, J., et al., *Survival Benefit of Adjuvant Chemoradiotherapy in Patients With Ampulla of Vater Cancer: A Systematic Review and Meta-analysis*. Annals of Surgery, 2015. **262**(1).
96. Maruthappu, M., et al., *The Influence of Volume and Experience on Individual Surgical Performance: A Systematic Review*. Annals of Surgery, 2015. **261**(4).
97. Matsuda, A., et al., *Abdominoperineal Resection Provides Better Local Control But Equivalent Overall Survival to Local Excision of Anorectal Malignant Melanoma: A Systematic Review*. Annals of Surgery, 2015. **261**(4).
98. Mazaki, T., Y. Ishii, and I. Murai, *Immunoenhancing Enteral and Parenteral Nutrition for Gastrointestinal Surgery: A Multiple-treatments Meta-analysis*. Annals of Surgery, 2015. **261**(4).
99. Menahem, B., et al., *Pancreaticogastrostomy Is Superior to Pancreaticojejunostomy for Prevention of Pancreatic Fistula After Pancreaticoduodenectomy: An Updated Meta-analysis of Randomized Controlled Trials*. Annals of Surgery, 2015. **261**(5).
100. Müller-Stich, B.P., et al., *Surgical Versus Medical Treatment of Type 2 Diabetes Mellitus in Nonseverely Obese Patients: A Systematic Review and Meta-analysis*. Annals of Surgery, 2015. **261**(3).
101. Panunzi, S., et al., *Predictors of Remission of Diabetes Mellitus in Severely Obese Individuals Undergoing Bariatric Surgery: Do BMI or Procedure Choice Matter? A Meta-analysis*. Annals of Surgery, 2015. **261**(3).
102. Roberts, D.J., et al., *Clinical Presentation of Patients With Tension Pneumothorax: A Systematic Review*. Annals of Surgery, 2015. **261**(6).
103. Rowland, S.P., et al., *Inferior Vena Cava Filters for Prevention of Venous Thromboembolism in Obese Patients Undergoing Bariatric Surgery: A Systematic Review*. Annals of Surgery, 2015. **261**(1).
104. Saleh, A., et al., *Glycopeptides Versus  $\beta$ -Lactams for the Prevention of Surgical Site Infections in Cardiovascular and Orthopedic Surgery: A Meta-Analysis*. Annals of Surgery, 2015. **261**(1).
105. Siminas, S. and P.D. Losty, *Current Surgical Management of Pediatric Idiopathic Constipation: A Systematic Review of Published Studies*. Annals of Surgery, 2015. **262**(6).
106. Szasz, P., et al., *Assessing Technical Competence in Surgical Trainees: A Systematic Review*. Annals of Surgery, 2015. **261**(6).
107. Vetter, D., et al., *Effects of Art on Surgical Patients: A Systematic Review and Meta-analysis*. Annals of Surgery, 2015. **262**(5).
108. Ahmed, N., et al., *A Systematic Review of the Effects of Resident Duty Hour Restrictions in Surgery: Impact on Resident Wellness, Training, and Patient Outcomes*. Annals of Surgery, 2014. **259**(6).

109. Almenawer, S.A., et al., *Chronic Subdural Hematoma Management: A Systematic Review and Meta-analysis of 34829 Patients*. Annals of Surgery, 2014. **259**(3).
110. Bouras, G., et al., *Systematic Review of the Impact of Surgical Harm on Quality of Life After General and Gastrointestinal Surgery*. Annals of Surgery, 2014. **260**(6).
111. Dawe, S.R., et al., *A Systematic Review of Surgical Skills Transfer After Simulation-Based Training: Laparoscopic Cholecystectomy and Endoscopy*. Annals of Surgery, 2014. **259**(2).
112. Fayanju, O.M., et al., *Contralateral Prophylactic Mastectomy After Unilateral Breast Cancer: A Systematic Review and Meta-analysis*. Annals of Surgery, 2014. **260**(6).
113. Findlay, J.M., et al., *Enhanced Recovery for Esophagectomy: A Systematic Review and Evidence-Based Guidelines*. Annals of Surgery, 2014. **259**(3).
114. Foster, J.D., et al., *Methods of Quality Assurance in Multicenter Trials in Laparoscopic Colorectal Surgery: A Systematic Review*. Annals of Surgery, 2014. **260**(2).
115. Grønkjær, M., et al., *Preoperative Smoking Status and Postoperative Complications: A Systematic Review and Meta-analysis*. Annals of Surgery, 2014. **259**(1).
116. Harrysson, I.J., et al., *Systematic Review of Learning Curves for Minimally Invasive Abdominal Surgery: A Review of the Methodology of Data Collection, Depiction of Outcomes, and Statistical Analysis*. Annals of Surgery, 2014. **260**(1).
117. Howell, A.-M., et al., *Reducing the Burden of Surgical Harm: A Systematic Review of the Interventions Used to Reduce Adverse Events in Surgery*. Annals of Surgery, 2014. **259**(4).
118. Kim, K.W., et al., *Imaging Features to Distinguish Malignant and Benign Branch-Duct Type Intraductal Papillary Mucinous Neoplasms of the Pancreas: A Meta-analysis*. Annals of Surgery, 2014. **259**(1).
119. Lee, L., et al., *A Systematic Review of Economic Evaluations of Enhanced Recovery Pathways for Colorectal Surgery*. Annals of Surgery, 2014. **259**(4).
120. Li, J., Z. Ji, and Y. Li, *The Comparison of Self-Gripping Mesh and Sutured Mesh in Open Inguinal Hernia Repair: The Results of Meta-analysis*. Annals of Surgery, 2014. **259**(6).
121. O'Callaghan, J.M., et al., *The Effect of Preservation Solutions for Storage of Liver Allografts on Transplant Outcomes: A Systematic Review and Meta-Analysis*. Annals of Surgery, 2014. **260**(1).
122. Orri, M., et al., *Being a Surgeon—The Myth and the Reality: A Meta-Synthesis of Surgeons' Perspectives About Factors Affecting Their Practice and Well-being*. Annals of Surgery, 2014. **260**(5).
123. Pöpping, D.M., et al., *Impact of Epidural Analgesia on Mortality and Morbidity After Surgery: Systematic Review and Meta-analysis of Randomized Controlled Trials*. Annals of Surgery, 2014. **259**(6).

124. Reames, B.N., S.P. Shubeck, and J.D. Birkmeyer, *Strategies for Reducing Regional Variation in the Use of Surgery: A Systematic Review*. Annals of Surgery, 2014. **259**(4).
125. Sharma, P.V., et al., *Systematic Review and Meta-analysis of the Role of Routine Colonic Evaluation After Radiologically Confirmed Acute Diverticulitis*. Annals of Surgery, 2014. **259**(2).
126. The United Kingdom National Surgical Research, C., *Safety of Short, In-Hospital Delays Before Surgery for Acute Appendicitis: Multicentre Cohort Study, Systematic Review, and Meta-Analysis*. Annals of Surgery, 2014. **259**(5).
127. Acedillo, R.R., et al., *The Risk of Perioperative Bleeding in Patients With Chronic Kidney Disease: A Systematic Review and Meta-Analysis*. Annals of Surgery, 2013. **258**(6).
128. Adie, S., et al., *CONSORT Compliance in Surgical Randomized Trials: Are We There Yet? A Systematic Review*. Annals of Surgery, 2013. **258**(6).
129. Bergqvist, D., M. Björck, and A. Wanhainen, *Treatment of Vascular Ehlers-Danlos Syndrome: A Systematic Review*. Annals of Surgery, 2013. **258**(2).
130. Broeders, J.A., et al., *Laparoscopic Anterior 180-Degree Versus Nissen Fundoplication for Gastroesophageal Reflux Disease: Systematic Review and Meta-Analysis of Randomized Clinical Trials*. Annals of Surgery, 2013. **257**(5).
131. Chang, W.K., et al., *Gentamicin-Collagen Implants to Reduce Surgical Site Infection: Systematic Review and Meta-analysis of Randomized Trials*. Annals of Surgery, 2013. **258**(1).
132. Eliassen, M., et al., *Preoperative Alcohol Consumption and Postoperative Complications: A Systematic Review and Meta-Analysis*. Annals of Surgery, 2013. **258**(6).
133. Haloua, M.H., et al., *A Systematic Review of Oncoplastic Breast-Conserving Surgery: Current Weaknesses and Future Prospects*. Annals of Surgery, 2013. **257**(4).
134. Honda, M., et al., *Hand-Sewn Versus Mechanical Esophagogastric Anastomosis After Esophagectomy: A Systematic Review and Meta-Analysis*. Annals of Surgery, 2013. **257**(2).
135. Houssami, N., R. Turner, and M. Morrow, *Preoperative Magnetic Resonance Imaging in Breast Cancer: Meta-Analysis of Surgical Outcomes*. Annals of Surgery, 2013. **257**(2).
136. Knops, A.M., et al., *Decision Aids for Patients Facing a Surgical Treatment Decision: A Systematic Review and Meta-analysis*. Annals of Surgery, 2013. **257**(5).
137. Leinicke, J.A., et al., *Operative Management of Rib Fractures in the Setting of Flail Chest: A Systematic Review and Meta-Analysis*. Annals of Surgery, 2013. **258**(6).
138. Lin, N.-C., H. Nitta, and G. Wakabayashi, *Laparoscopic Major Hepatectomy: A Systematic Literature Review and Comparison of 3 Techniques*. Annals of Surgery, 2013. **257**(2).

139. O'Brien, P.E., et al., *Long-Term Outcomes After Bariatric Surgery: Fifteen-Year Follow-Up of Adjustable Gastric Banding and a Systematic Review of the Bariatric Surgical Literature*. Annals of Surgery, 2013. **257**(1).
140. Parikh, M., et al., *Surgical Strategies That May Decrease Leak After Laparoscopic Sleeve Gastrectomy: A Systematic Review and Meta-Analysis of 9991 Cases*. Annals of Surgery, 2013. **257**(2).
141. Roberts, D.J., et al., *Diagnostic Accuracy of Computed Tomographic Angiography for Blunt Cerebrovascular Injury Detection in Trauma Patients: A Systematic Review and Meta-Analysis*. Annals of Surgery, 2013. **257**(4).
142. Russ, S., et al., *Do Safety Checklists Improve Teamwork and Communication in the Operating Room? A Systematic Review*. Annals of Surgery, 2013. **258**(6).
143. Schoenberg, M.B., et al., *Laparoscopic Heller Myotomy Versus Endoscopic Balloon Dilatation for the Treatment of Achalasia: A Network Meta-Analysis*. Annals of Surgery, 2013. **258**(6).
144. Teraa, M., et al., *Autologous Bone Marrow-Derived Cell Therapy in Patients With Critical Limb Ischemia: A Meta-Analysis of Randomized Controlled Clinical Trials*. Annals of Surgery, 2013. **258**(6).
145. Yin, Z., et al., *Is the End of the T-Tube Drainage Era in Laparoscopic Choledochotomy for Common Bile Duct Stones Is Coming? A Systematic Review and Meta-Analysis*. Annals of Surgery, 2013. **257**(1).
146. Zendejas, B., et al., *State of the Evidence on Simulation-Based Training for Laparoscopic Surgery: A Systematic Review*. Annals of Surgery, 2013. **257**(4).
147. Acheson, A.G., M.J. Brookes, and D.R. Spahn, *Effects of Allogeneic Red Blood Cell Transfusions on Clinical Outcomes in Patients Undergoing Colorectal Cancer Surgery: A Systematic Review and Meta-Analysis*. Annals of Surgery, 2012. **256**(2).
148. Blencowe, N.S., et al., *Reporting of Short-Term Clinical Outcomes After Esophagectomy: A Systematic Review*. Annals of Surgery, 2012. **255**(4).
149. Borchard, A., et al., *A Systematic Review of the Effectiveness, Compliance, and Critical Factors for Implementation of Safety Checklists in Surgery*. Annals of Surgery, 2012. **256**(6).
150. Chang, W.K., et al., *Triclosan-Impregnated Sutures to Decrease Surgical Site Infections: Systematic Review and Meta-Analysis of Randomized Trials*. Annals of Surgery, 2012. **255**(5).
151. Edwards, J.P., et al., *Wound Protectors Reduce Surgical Site Infection: A Meta-Analysis of Randomized Controlled Trials*. Annals of Surgery, 2012. **256**(1).
152. Gheorghe, A., et al., *Systematic Review of the Clinical Effectiveness of Wound-edge Protection Devices in Reducing Surgical Site Infection in Patients Undergoing Open Abdominal Surgery*. Annals of Surgery, 2012. **255**(6).
153. Guo, L., et al., *Meta-Analysis of Clinical Efficacy of Pulsed Radio Frequency Energy Treatment*. Annals of Surgery, 2012. **255**(3).

154. Hansson, B.M.E., et al., *Surgical Techniques for Parastomal Hernia Repair: A Systematic Review of the Literature*. Annals of Surgery, 2012. **255**(4).
155. Kao, L.S., et al., *Should Perioperative Supplemental Oxygen Be Routinely Recommended for Surgery Patients? A Bayesian Meta-Analysis*. Annals of Surgery, 2012. **256**(6).
156. Lehmann, K., et al., *Chemotherapy Before Liver Resection of Colorectal Metastases: Friend or Foe?* Annals of Surgery, 2012. **255**(2).
157. Makino, T., et al., *The Impact of Obesity on Perioperative Outcomes After Laparoscopic Colorectal Resection*. Annals of Surgery, 2012. **255**(2).
158. Marimuthu, K., et al., *A Meta-Analysis of the Effect of Combinations of Immune Modulating Nutrients on Outcome in Patients Undergoing Major Open Gastrointestinal Surgery*. Annals of Surgery, 2012. **255**(6).
159. O'Reilly, E.A., J.P. Burke, and P.R. O'Connell, *A Meta-Analysis of Surgical Morbidity and Recurrence After Laparoscopic and Open Repair of Primary Unilateral Inguinal Hernia*. Annals of Surgery, 2012. **255**(5).
160. Rahbour, G., et al., *A Meta-analysis of Outcomes Following Use of Somatostatin and Its Analogues for the Management of Enterocutaneous Fistulas*. Annals of Surgery, 2012. **256**(6).
161. Shabanzadeh, D.M. and L.T. Sørensen, *Laparoscopic Surgery Compared With Open Surgery Decreases Surgical Site Infection in Obese Patients: A Systematic Review and Meta-Analysis*. Annals of Surgery, 2012. **256**(6).
162. Sørensen, L.T., *Wound Healing and Infection in Surgery: The Pathophysiological Impact of Smoking, Smoking Cessation, and Nicotine Replacement Therapy: A Systematic Review*. Annals of Surgery, 2012. **255**(6).
163. Talat, N., A.P. Belgaumkar, and K.-M. Schulte, *Surgery in Castleman's Disease: A Systematic Review of 404 Published Cases*. Annals of Surgery, 2012. **255**(4).
164. van Baal, M.C., et al., *Timing of Cholecystectomy After Mild Biliary Pancreatitis: A Systematic Review*. Annals of Surgery, 2012. **255**(5).
165. Venkat, R., et al., *Laparoscopic Distal Pancreatectomy Is Associated With Significantly Less Overall Morbidity Compared to the Open Technique: A Systematic Review and Meta-Analysis*. Annals of Surgery, 2012. **255**(6).
166. Verschuur-Maes, A.H.J., et al., *Columnar Cell Lesions on Breast Needle Biopsies: Is Surgical Excision Necessary?: A Systematic Review*. Annals of Surgery, 2012. **255**(2).
167. Viñuela, E.F., et al., *Laparoscopic Versus Open Distal Gastrectomy for Gastric Cancer: A Meta-Analysis of Randomized Controlled Trials and High-Quality Nonrandomized Studies*. Annals of Surgery, 2012. **255**(3).
168. Warschkow, R., et al., *Safe and Early Discharge After Colorectal Surgery Due to C-Reactive Protein: A Diagnostic Meta-Analysis of 1832 Patients*. Annals of Surgery, 2012. **256**(2).
169. Zeng, Y.-K., et al., *Laparoscopy-Assisted Versus Open Distal Gastrectomy for Early Gastric Cancer: Evidence from Randomized and Nonrandomized Clinical Trials*. Annals of Surgery, 2012. **256**(1).

170. Zevin, B., R. Aggarwal, and T.P. Grantcharov, *Volume-Outcome Association in Bariatric Surgery: A Systematic Review*. Annals of Surgery, 2012. **256**(1).
171. Makino, T., J.W. Milsom, and S.W. Lee, *Feasibility and Safety of Single-Incision Laparoscopic Colectomy: A Systematic Review*. Annals of Surgery, 2012. **255**(4).
172. Ahmad, N.Z. and A. Ahmed, *Meta-analysis of the Effectiveness of Surgical Scalpel or Diathermy in Making Abdominal Skin Incisions*. Annals of Surgery, 2011. **253**(1).
173. Boshier, P.R., O. Anderson, and G.B. Hanna, *Transthoracic Versus Transhiatal Esophagectomy for the Treatment of Esophagogastric Cancer: A Meta-Analysis*. Annals of Surgery, 2011. **254**(6).
174. Broeders, J.A., et al., *Laparoscopic Anterior Versus Posterior Fundoplication for Gastroesophageal Reflux Disease: Systematic Review and Meta-Analysis of Randomized Clinical Trials*. Annals of Surgery, 2011. **254**(1).
175. Dhir, M., et al., *Influence of Margins on Overall Survival After Hepatic Resection for Colorectal Metastasis: A Meta-Analysis*. Annals of Surgery, 2011. **254**(2).
176. Groeneveld, A.B.J., R.J. Navickis, and M.M. Wilkes, *Update on the Comparative Safety of Colloids: A Systematic Review of Clinical Studies*. Annals of Surgery, 2011. **253**(3).
177. Houssami, N., et al., *Preoperative Ultrasound-Guided Needle Biopsy of Axillary Nodes in Invasive Breast Cancer: Meta-Analysis of Its Accuracy and Utility in Staging the Axilla*. Annals of Surgery, 2011. **254**(2).
178. Jay, C.L., et al., *Ischemic Cholangiopathy After Controlled Donation After Cardiac Death Liver Transplantation: A Meta-analysis*. Annals of Surgery, 2011. **253**(2).
179. Memon, M.A., et al., *Meta-Analysis of D1 Versus D2 Gastrectomy for Gastric Adenocarcinoma*. Annals of Surgery, 2011. **253**(5).
180. Mertz, D., J. Johnstone, and M. Loeb, *Does Duration of Perioperative Antibiotic Prophylaxis Matter in Cardiac Surgery? A Systematic Review and Meta-Analysis*. Annals of Surgery, 2011. **254**(1).
181. Mirnezami, A., et al., *Increased Local Recurrence and Reduced Survival From Colorectal Cancer Following Anastomotic Leak: Systematic Review and Meta-Analysis*. Annals of Surgery, 2011. **253**(5).
182. Mollberg, N., et al., *Arterial Resection During Pancreatectomy for Pancreatic Cancer: A Systematic Review and Meta-Analysis*. Annals of Surgery, 2011. **254**(6).
183. Patel, S., et al., *Positron Emission Tomography/Computed Tomographic Scans Compared to Computed Tomographic Scans for Detecting Colorectal Liver Metastases: A Systematic Review*. Annals of Surgery, 2011. **253**(4).
184. Pontiroli, A.E. and A. Morabito, *Long-term Prevention of Mortality in Morbid Obesity Through Bariatric Surgery. A Systematic Review and Meta-analysis of Trials Performed With Gastric Banding and Gastric Bypass*. Annals of Surgery, 2011. **253**(3).

185. Srinivasa, S., et al., *Preoperative Glucocorticoid Use in Major Abdominal Surgery: Systematic Review and Meta-Analysis of Randomized Trials*. Annals of Surgery, 2011. **254**(2).
186. Thakur, V., C.M. Schlachta, and S. Jayaraman, *Minilaparoscopic Versus Conventional Laparoscopic Cholecystectomy: A Systematic Review and Meta-analysis*. Annals of Surgery, 2011. **253**(2).
